# Supplementary material for: Age-Dependent Maturation of iPSC-CMs Leads to the Enhanced Compartmentation of β2AR-cAMP Signalling
Source: MDPI journal article supplement (doi:10.3390/cells9102275), 2020-10-12
Supplement: s1 [file s1]

Supplementary figure.

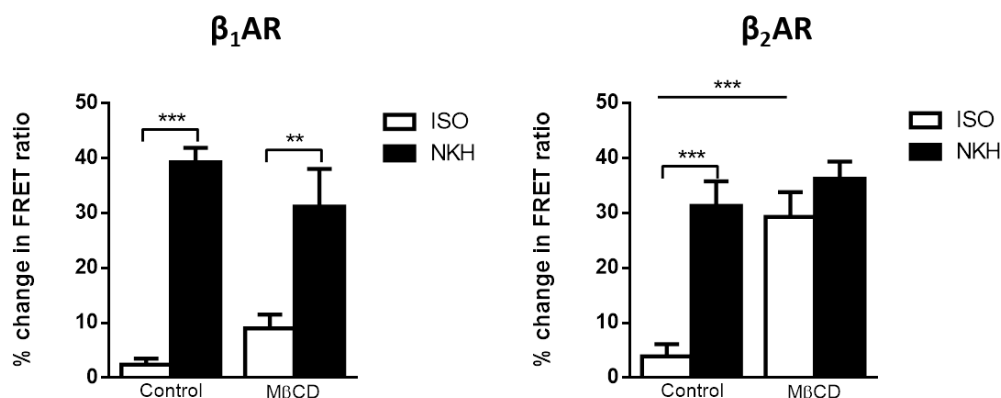

**Figure S1.** Cyclic AMP levels in iCell cell line following cholesterol removal and selective  $\beta_1$ AR or  $\beta_2$ AR stimulation. The association of  $\beta_1$ AR- (n = 19/3) and  $\beta_2$ AR-cAMP (n = 18/5) activity with caveolae was assessed by stimulation with isoprenaline in the presence of ICI or CGP, respectively, with subsequent AC activation with NKH. M $\beta$ CD was used to deplete caveolae in order to depict the role of caveolae in compartmentalising the  $\beta_1$ AR (n = 6/2) and  $\beta_2$ AR (n = 9/3) response. Data are presented as mean  $\pm$  SEM. \*p < 0.05, \*\*p < 0.01, \*\*\*p < 0.001. n = cells/batches.

Supplementary table

**Table S1.** Sequences of primers used in the study.

| Target Gene  | Forward sequence     | Reverse sequence     |
|--------------|----------------------|----------------------|
| $\beta_1$ AR | GACGCTCACCAACCTCTTCA | CACAGCTCGCAGAAGAAGGA |
| $\beta_2$ AR | TTGCCTCTTCATCGTGTCC  | CCACCTGGCTAAGGTTCTGG |
| CAV3         | GCGGAAGGAGGTCTAAAGC  | AGAGCGAAGGGCCATTGT   |
| GAPDH        | AATCCCATCACCATCTTCCA | TGGACTCCACGACGTACTCA |
